# Supplementary material
Source: Springer Nature journal article supplement (https://www.springermedizin.de/resource/supplementary/12885_2007_1133_MOESM2_ESM.pdf/9471192)

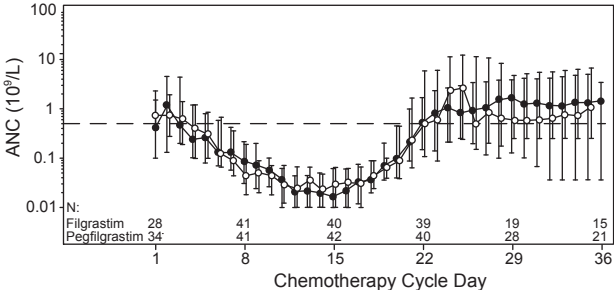

N:

Filgrastim 28

34

Pegfilgrastim 34

41

41

41

40

42

39

40

19

28

15

21

Supplement: MOESM2 [file 9471192]
